# Supplementary material
Source: PubMed Central journal article supplement (PMC3340259)

**Supplemental material**

**Sorting nexin 27 interacts with multidrug resistance-associated protein 4 (MRP4) and mediates the internalization of MRP4**

Hisamitsu Hayashi<sup>1</sup>, Sotaro Naoi<sup>1</sup>, Takayuki Nakagawa<sup>1</sup>, Toru Nishikawa<sup>2</sup>, Hiroyuki Fukuda<sup>3</sup>, Shinobu Imajoh-Ohmi<sup>3</sup>, Ayano Kondo<sup>1</sup>, Kiyotaka Kubo<sup>1</sup>, Takashi Yabuki<sup>1</sup>, Asami Hattori<sup>1</sup>, Masakazu Hirouchi<sup>1</sup>, and Yuichi Sugiyama<sup>1</sup>

<sup>1</sup> Laboratory of Molecular Pharmacokinetics, Graduate School of Pharmaceutical Sciences, The University of Tokyo, 7-3-1 Hongo, Bunkyo-ku, Tokyo 113-0033, Japan

<sup>2</sup> Department of Psychiatry and Behavioral Sciences, Graduate School of Medical and Dental Sciences, Tokyo Medical and Dental University, 1-5-45, Yushima, Bunkyo-ku, Tokyo 113-8519, Japan

<sup>3</sup> Institute of Medical Science, The University of Tokyo, 4-6-1 Shirokanedai, Minato-ku, Tokyo 108-8639, Japan

Running title: Regulation of MRP4 internalization by SNX27

Address correspondence to: Hisamitsu Hayashi, Ph. D. or Yuichi Sugiyama, Ph. D., Laboratory of Molecular Pharmacokinetics, Department of Medical Pharmaceutics, Graduate School of Pharmaceutical Sciences, The University of Tokyo, 7-3-1 Hongo, Bunkyo-ku, Tokyo 113-0033, Japan

Phone: +81-3-5841-4770 (H.H.), +81-3-5841-4770 (Y.S.) Fax: +81-3-5841-4766

E-mail: [hayapi@mol.f.u-tokyo.ac.jp](mailto:hayapi@mol.f.u-tokyo.ac.jp) (H.H.), [sugiyama@mol.f.u-tokyo.ac.jp](mailto:sugiyama@mol.f.u-tokyo.ac.jp) (Y.S.)

**Figure legends for supplemental figure**

**Supplemental Figure 1----- Cellular localization of LAMP1 in COS-1 cells expressing AcGFP-Rab4 or –Rab5.**

COS-1 cells transfected with pAcGFP-C1 containing Rab4 (A) or Rab5 (B) were stained with anti-LAMP1 antibody for confocal immunofluorescence microscopy as described in the Experimental procedures. Scale bar: 10  $\mu$ m. A representative result from three independent experiments is shown.

# Supplemental Figure 1

**A.**

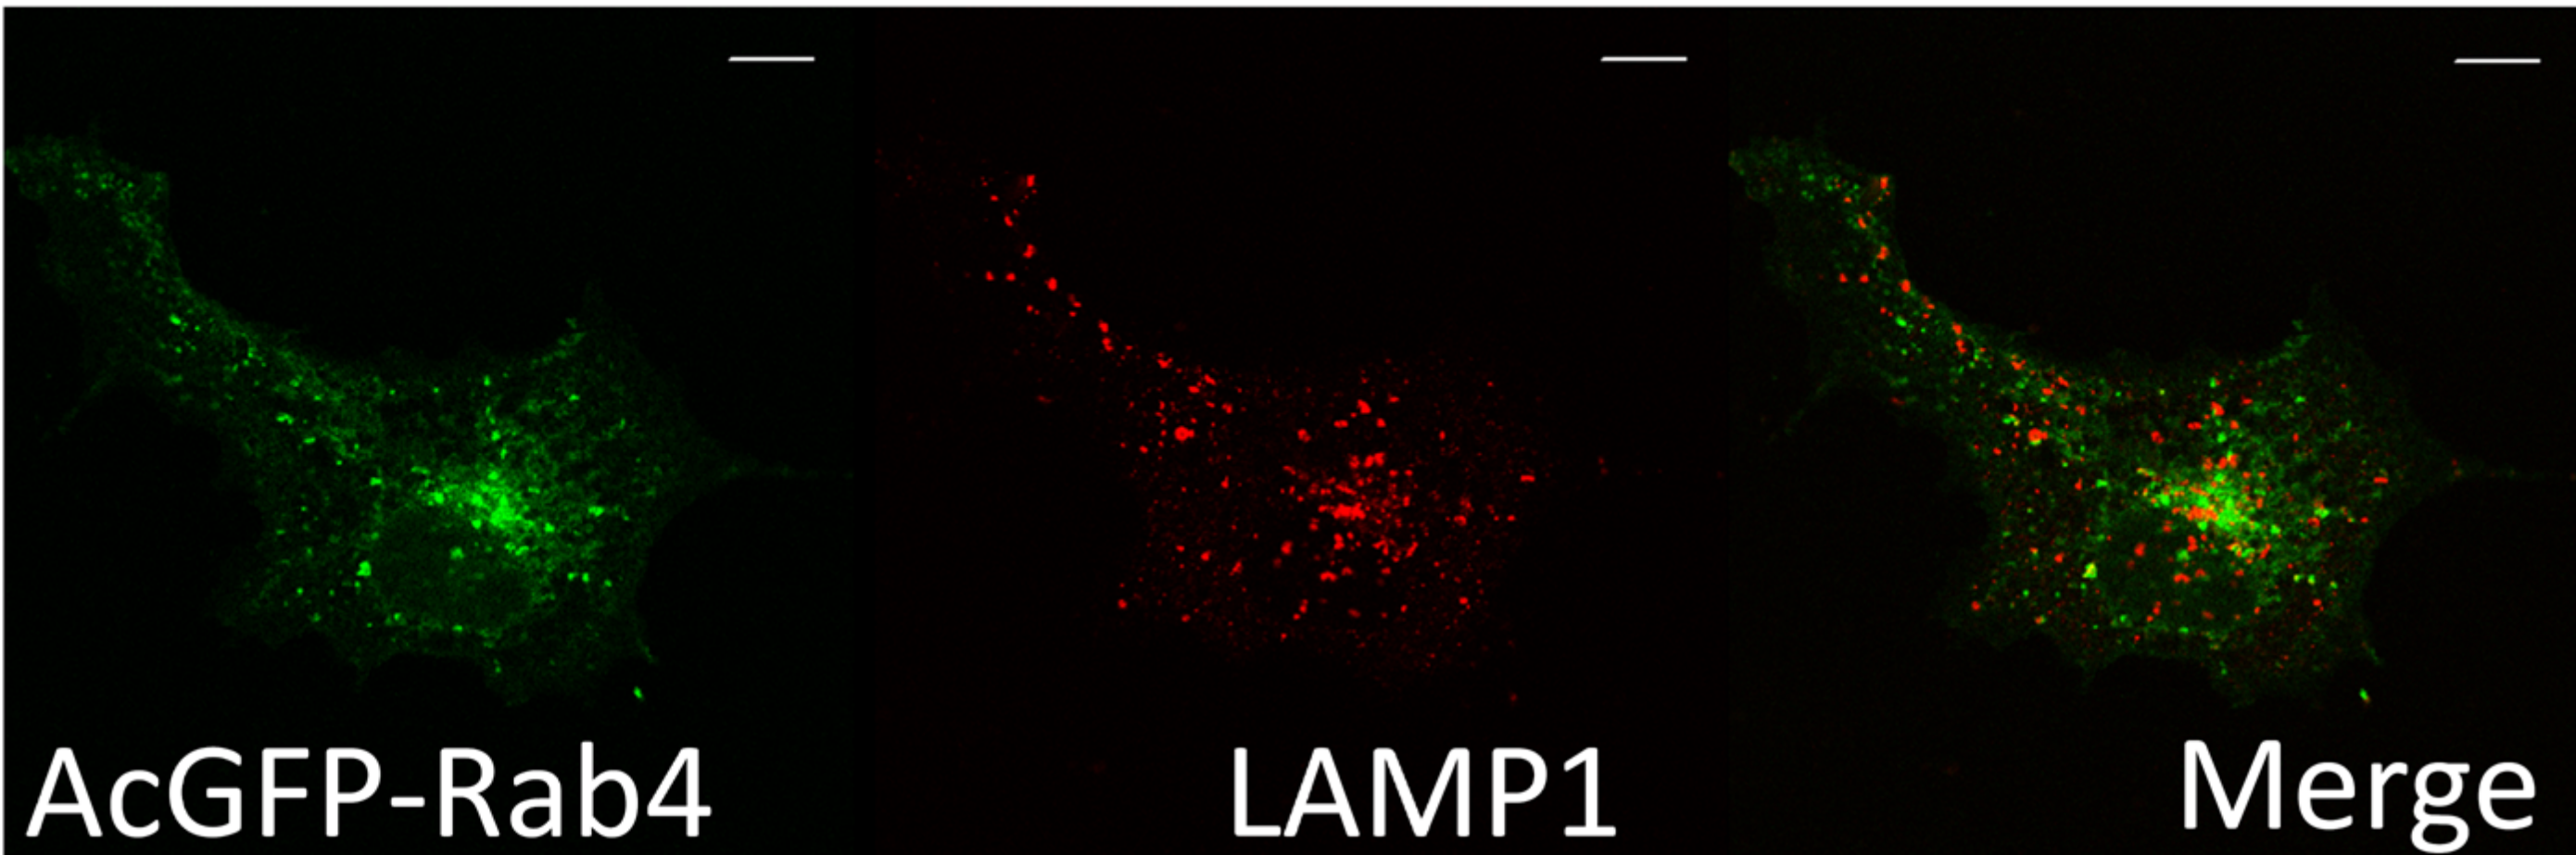

**B.**

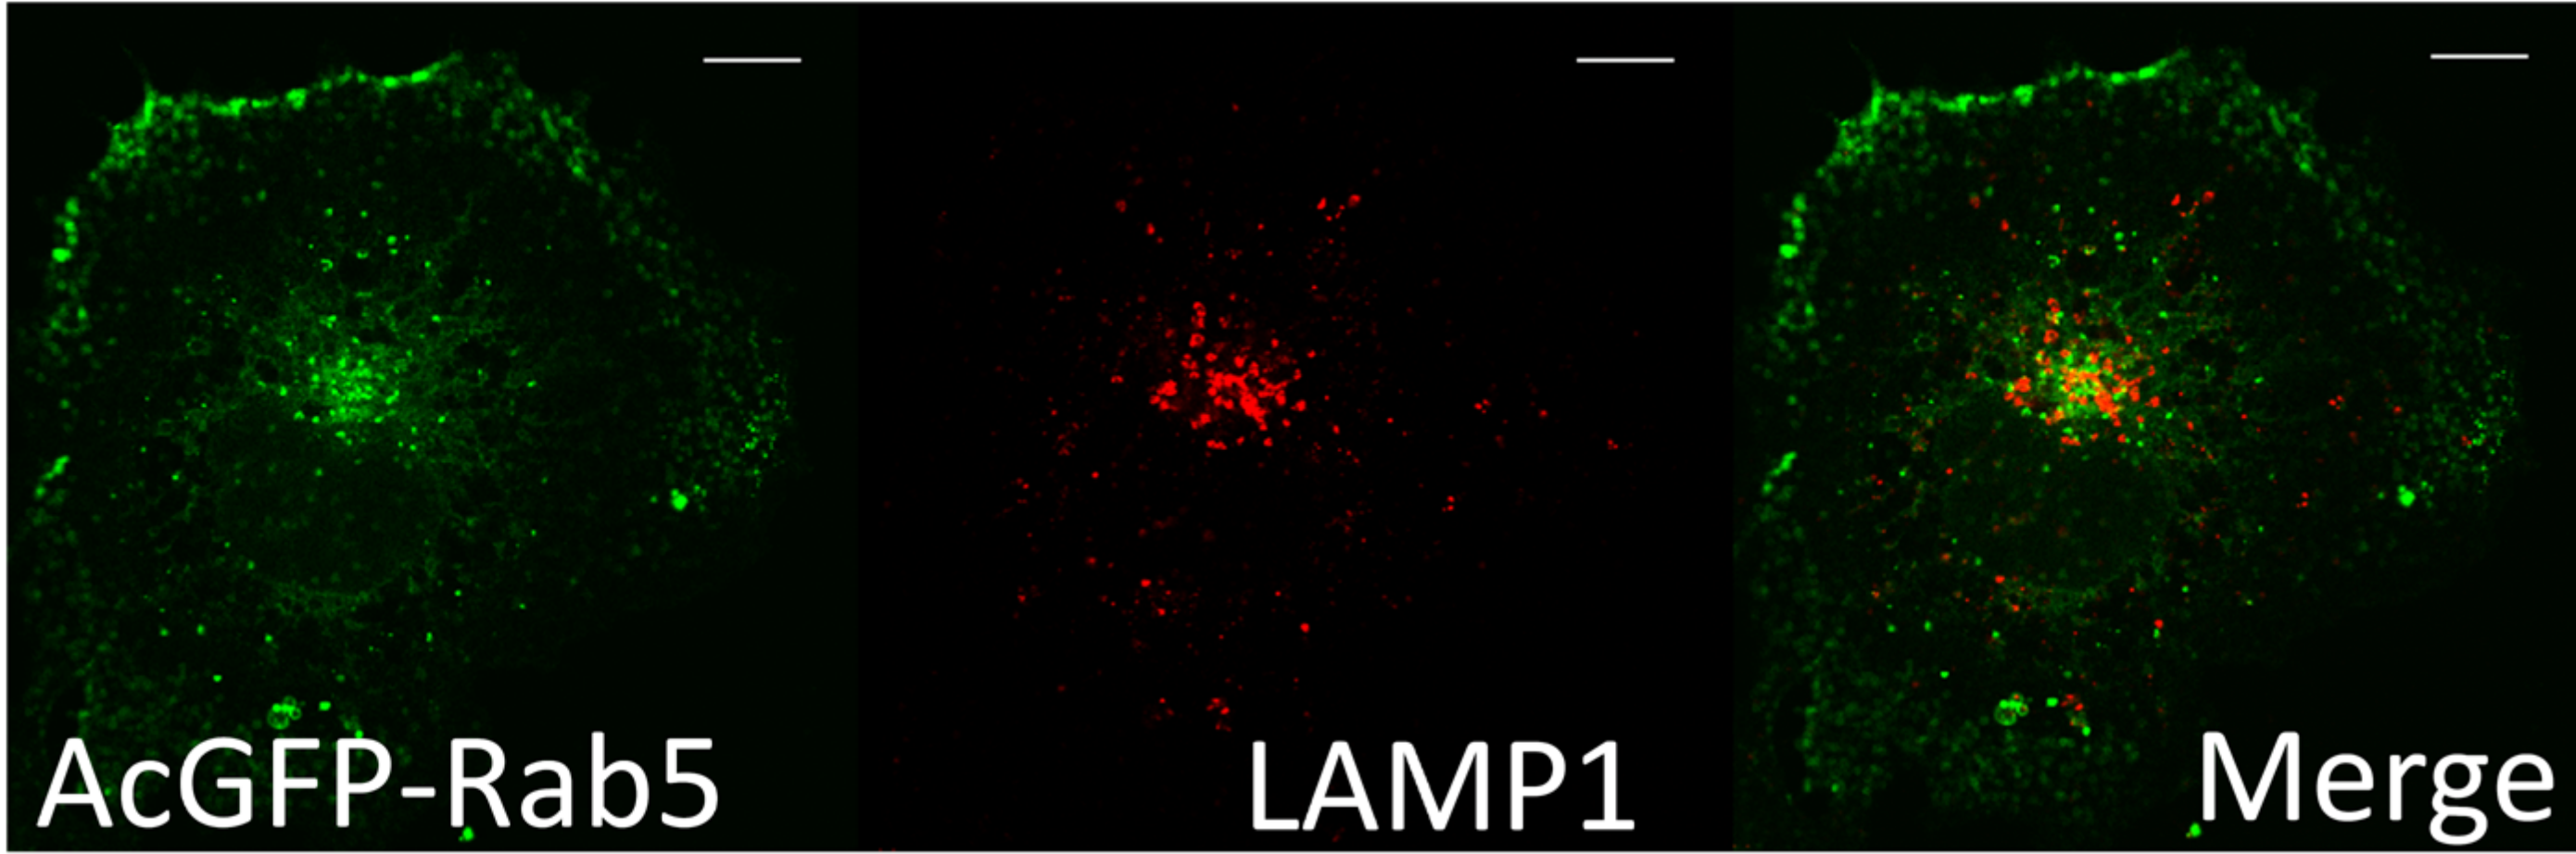

Supplement: supp_M111.337931_jbc.M111.337931-1.pdf [file supp_M111.337931_jbc.M111.337931-1.pdf]
